# Supplementary material for: Ozone exposure upregulates the expression of host susceptibility protein TMPRSS2 to SARS-CoV-2
Source: PubMed Central journal article supplement (PMC8789794; doi:10.1038/s41598-022-04906-8), 2022-01-25
Supplement: 41598_2022_4906_MOESM1_ESM.pdf [file 41598_2022_4906_MOESM1_ESM.pdf]

**Supplementary Figure 1.** Western blot gel image

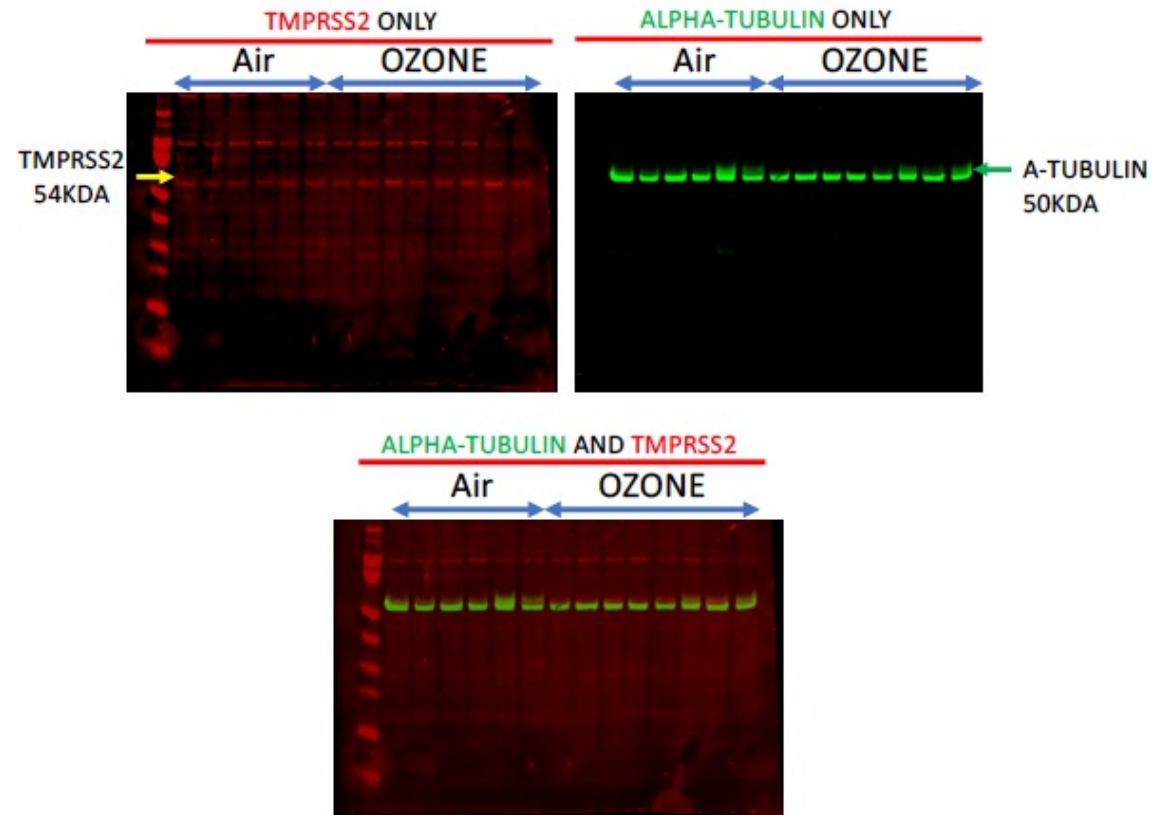

**Supplementary Figure 1.** Western blot gel image showing bands for TMPRSS2 protein on the whole lung homogenate from Air- and Ozone-exposed mice (n=6-8).
